# Supplementary material for: Red, orange, yellow and green luminescence by carbon dots: hydrogen-bond-induced solvation effects
Source: Royal Society of Chemistry journal article supplement (doi:10.1039/d0nr08128k), 2021-01-01
Supplement: d0nr08128k1.pdf [file d0nr08128k1.pdf]

## Supporting Information

### Red, Orange, yellow and Green Luminescence by Carbon Dots: Hydrogen Bond Induced Solvation Effect

Xiaokai Xu<sup>a</sup>, Guangqi Hu<sup>a</sup>, Luoqi Mo<sup>a</sup>, Yadong Li<sup>a</sup>, Haopeng Wei<sup>a</sup>, Bingfu Lei<sup>a</sup>, Xuejie Zhang<sup>a</sup>, Chaofan Hu<sup>a\*</sup>, Jianle Zhuang<sup>a\*</sup>, Yingliang Liu<sup>a\*</sup>

<sup>a</sup> Key Laboratory for Biobased Materials and Energy of Ministry of Education/Guangdong Provincial Engineering Technology Research Center for Optical Agriculture, College of Materials and Energy, South China Agricultural University, Guangzhou, 510642, China.  
E-mail: thucf@scau.edu.cn; zhuangjl@scau.edu.cn; tliuyl@scau.edu.cn.

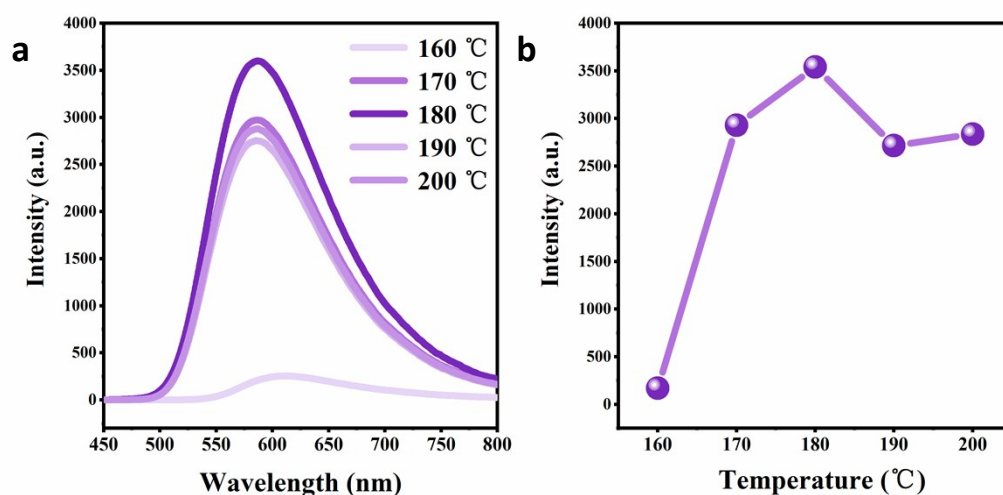

**Figure S1.** a) Fluorescence spectrum of CDs synthesized at different temperatures. b) The line chart of the luminescence intensity of synthesized CDs at different temperatures.

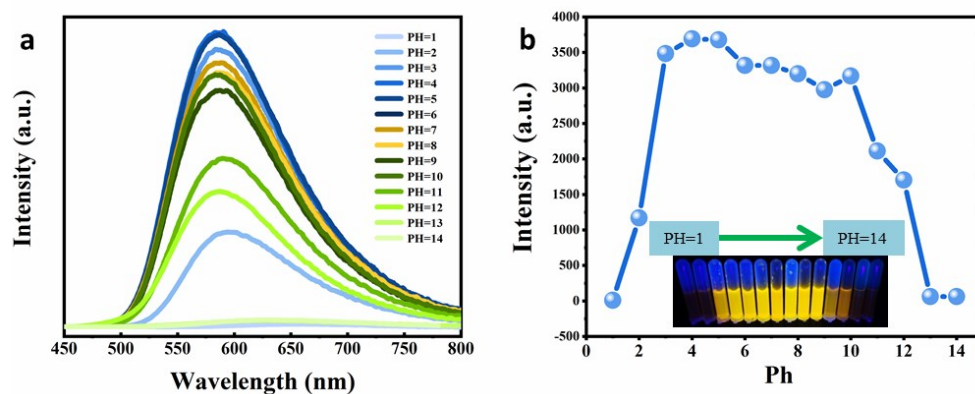

**Figure S2.** Fluorescence spectrum CDs solution at different PH. b) The line chart of the luminescence intensity of synthesized carbon dots at different PH.

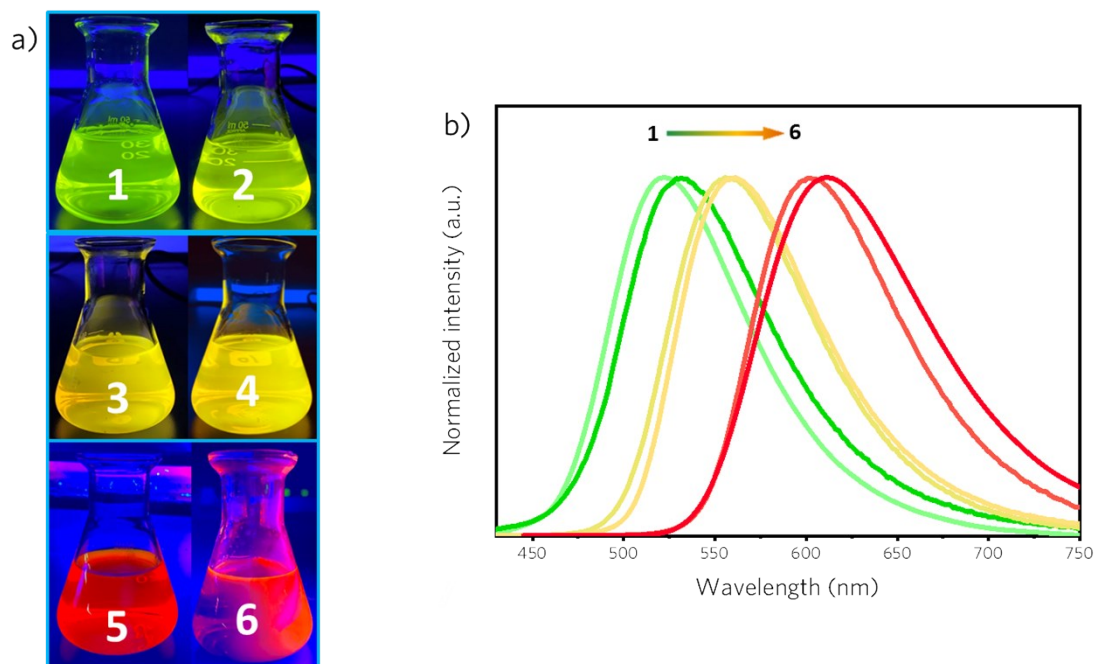

**Figure S3.** a) Photographs of CDs in different solvents under 365 nm excitation, b) Fluorescence spectrum of CDs in different solvents under 365 nm excitation. (1: acetone, 2:DMSO, 3: methyl alcohol, 4: propyl alcohol, 5: acetic acid, 6: formic acid)

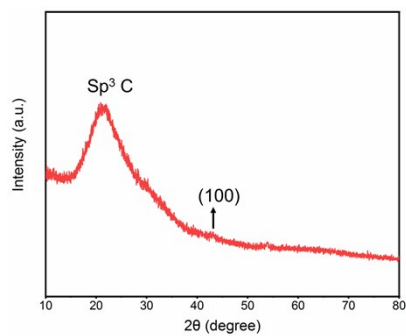

**Figure S4.** XRD pattern of CDs powder.

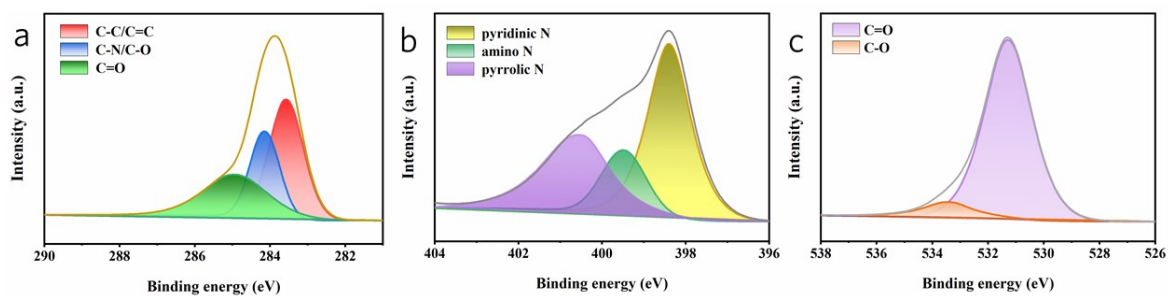

**Figure S5.** XPS spectrum of CDs powder, high-resolution XPS spectra of C 1s a), N 1s b), O 1s c).

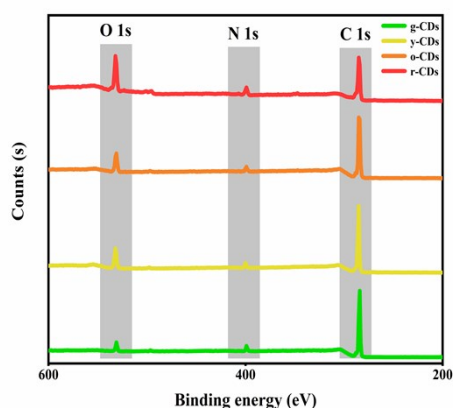

**Figure S6.** XPS spectrum of g-CDs, y-CDs, o-CDs and r-CDs.

**Table S1.** Element content of high-resolution XPS spectrum of g-CDs, y-CDs, o-CDs and r-CDs.

| Sample | g-CDs  | y-CDs  | o-CDs  | r-CDs  |
|--------|--------|--------|--------|--------|
| C      | 89.29% | 83.96% | 80.99% | 67.23% |
| O      | 5.62%  | 11.39% | 14.25% | 23.92% |
| N      | 5.1%   | 4.66%  | 4.76%  | 8.77%  |

**Table S2.** Chemical bond content of high-resolution C 1s of g-CDs, y-CDs, o-CDs and r-CDs.

| Sample  | g-CDs  | y-CDs  | o-CDs  | r-CDs  |
|---------|--------|--------|--------|--------|
| C-C/C=C | 68.89% | 63.46% | 15.63% | 17.32% |
| C-N/C-O | 27.40% | 32.69% | 54.94% | 28.38% |
| C=O     | 3.71%  | 3.84%  | 26.13% | 48.45% |
| COOH    | /      | /      | 3.30%  | 5.85%  |

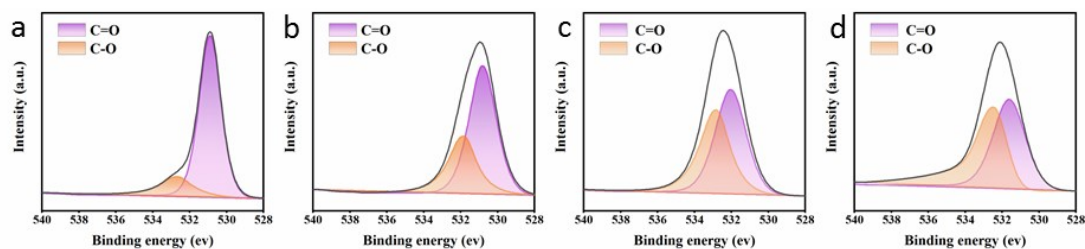

**Figure S7.** High-resolution O 1s spectrum of g-CDs, y-CDs, o-CDs and r-CDs a-d).

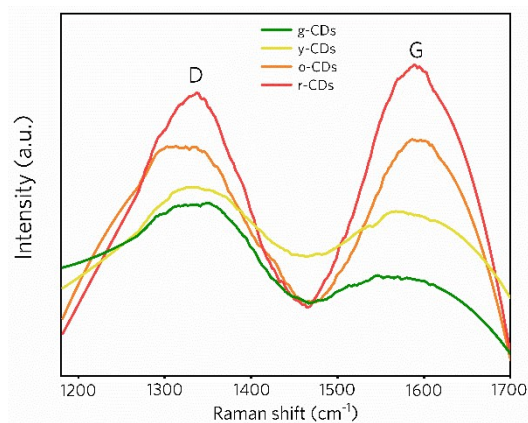

**Figure S8.** Raman spectra of g-CDs, y-CD, o-CDs, r-CD.

**Table S3.**  $A_D/A_G$  of g-CDs, y-CDs, o-CDs and r-CDs.

| Sample                         | g-CDs | y-CDs | o-CDs | r-CDs |
|--------------------------------|-------|-------|-------|-------|
| A <sub>D</sub> /A <sub>G</sub> | 1.67  | 1.25  | 1.03  | 0.85  |

**Table S4.** QY, lifetimes and photostability of the g-CDs, y-CDs, o-CDs, r-CDs, and composites. (Photostability refers to the attenuation's percentage by continuing radiation for 10 h, under excitation at 400 nm. Voltage is 600 V)

|                                     | QY (%) | Lifetimes (ns) | Light stability (%) |
|-------------------------------------|--------|----------------|---------------------|
| g-CDs solution                      | 18.05% | 3.38 ns        | 85%                 |
| y-CDs solution                      | 33.53% | 2.42 ns        | 83%                 |
| o-CDs solution                      | 6.60%  | 2.34 ns        | 87%                 |
| r-CDs solution                      | 1.05%  | 1.71 ns        | 85%                 |
| g-CDs/cellulose                     | 2.25%  | 3.44 ns        | 90%                 |
| y-CDs/cellulose                     | 1.90%  | 3.59 ns        | 91%                 |
| o-CDs/cellulose                     | 5.23%  | 3.30 ns        | 90%                 |
| r-CDs/cellulose                     | 3.71%  | 3.15 ns        | 89%                 |
| g-CDs/starch                        | 6.77%  | 3.75 ns        | 90%                 |
| y-CDs/starch                        | 2.47%  | 3.72 ns        | 95%                 |
| o-CDs/starch                        | 3.40%  | 3.68 ns        | 92%                 |
| r-CDs/starch                        | 5.03%  | 3.29 ns        | 90%                 |
| g-CDs/B <sub>2</sub> O <sub>3</sub> | 5.90%  | 5.06 ns        | 89%                 |
| y-CDs/B <sub>2</sub> O <sub>3</sub> | 6.50%  | 3.84 ns        | 87%                 |
| o-CDs/B <sub>2</sub> O <sub>3</sub> | 2.10%  | 3.72 ns        | 89%                 |
| r-CDs/B <sub>2</sub> O <sub>3</sub> | 2.70%  | 3.89 ns        | 90%                 |

**Table S5.** K<sub>NR</sub> of the g-CDs, y-CDs, o-CDs, r-CDs.

|                     | g-CDs  | y-CDs  | o-CDs  | r-CDs  |
|---------------------|--------|--------|--------|--------|
| K <sub>NR(ns)</sub> | 0.2958 | 0.2967 | 0.3991 | 0.5787 |

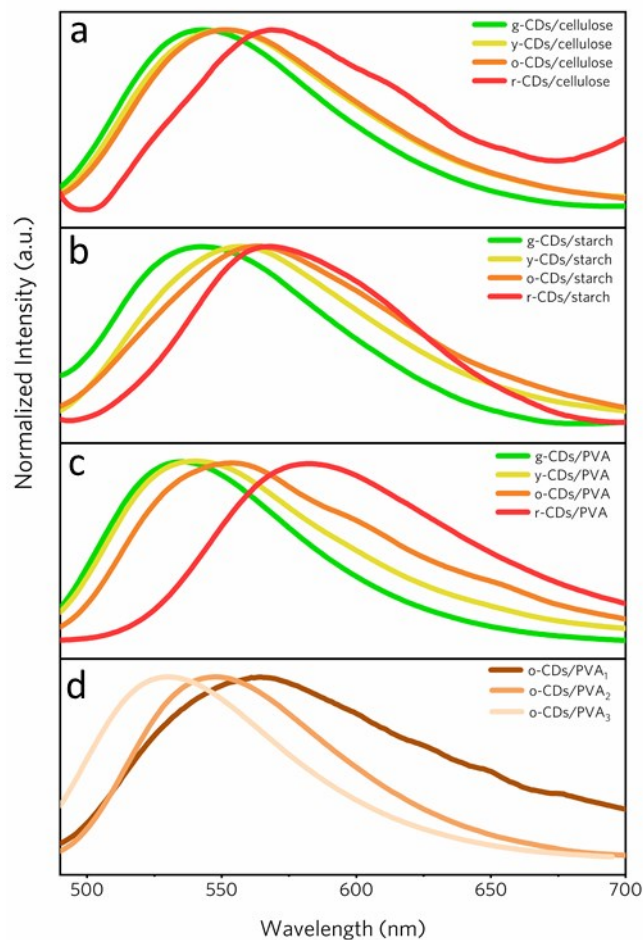

**Figure S9.** The normalized fluorescence spectrum of the CDs/cellulose a), CDs/starch b) and CDs/PVA c) state. d) The normalized fluorescence spectrum of different concentrations of CDs/PVA (1:1g/L, 2:5g/L, 3:10g/L).

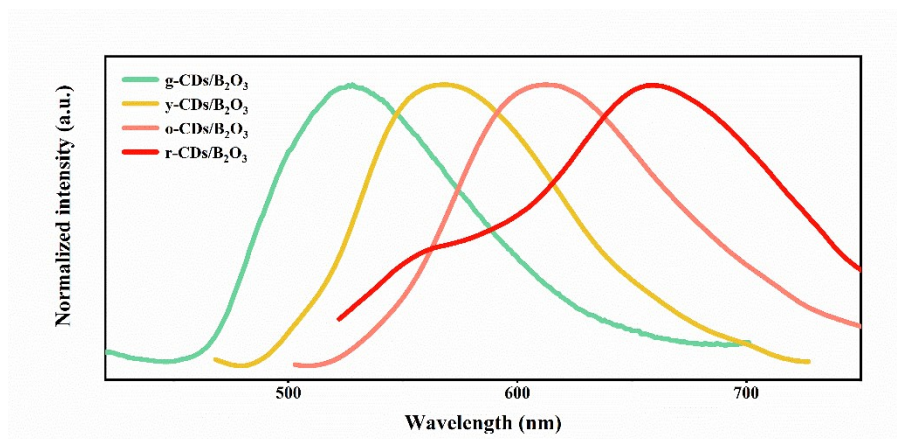

**Figure S10.** The normalized fluorescence spectrum of g-CDs/B<sub>2</sub>O<sub>3</sub>, y-CDs/B<sub>2</sub>O<sub>3</sub>, o-CDs/B<sub>2</sub>O<sub>3</sub> and r-CDs/B<sub>2</sub>O<sub>3</sub> phosphors.

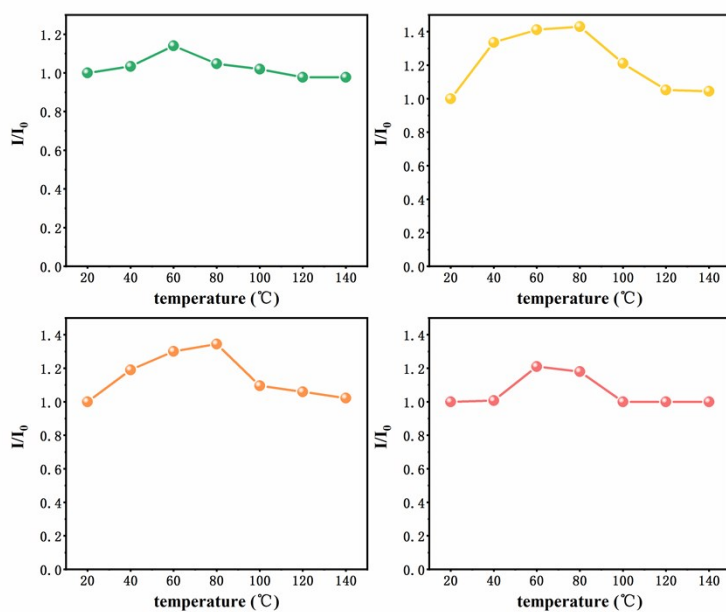

**Figure S11.** The integrated fluorescence intensity of g-CDs/B<sub>2</sub>O<sub>3</sub> a) y-CDs/B<sub>2</sub>O<sub>3</sub> b) o-CDs/B<sub>2</sub>O<sub>3</sub> and r-CDs/B<sub>2</sub>O<sub>3</sub> phosphors at different temperatures.

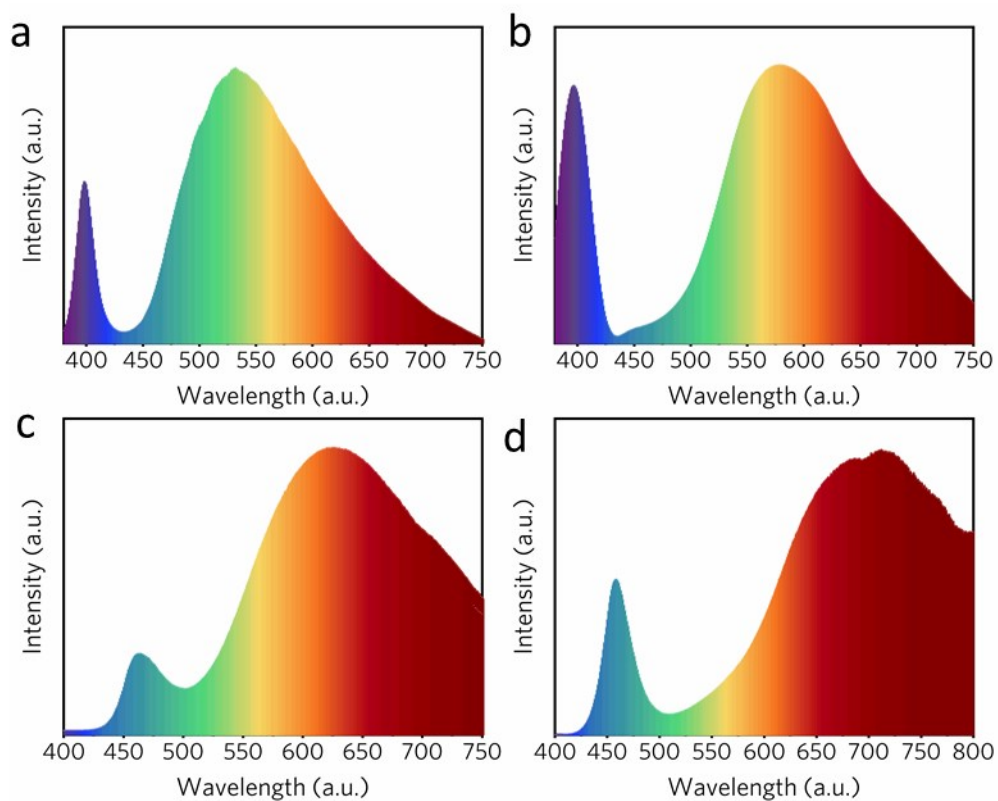

**Figure S12.** a-d) The photoluminescence spectrum of single emissive UV-LED and blue-LED coating g-CDs/B<sub>2</sub>O<sub>3</sub>, y-CDs/B<sub>2</sub>O<sub>3</sub>, o-CDs/B<sub>2</sub>O<sub>3</sub>, r-CDs/B<sub>2</sub>O<sub>3</sub>, respectively.

**Table S6.** CIE color coordinates (x, y), CRI, CCT, and mass ratios (g-CDs/B<sub>2</sub>O<sub>3</sub>, y-CDs/B<sub>2</sub>O<sub>3</sub>, o-CDs/B<sub>2</sub>O<sub>3</sub>, r-CDs/B<sub>2</sub>O<sub>3</sub> phosphors) of WLEDs.

| Number        | Mass Ratio | CIE (x,y)    | CCT (K) | CRI  |
|---------------|------------|--------------|---------|------|
| 460 nm chip-1 | 1:1:2:2    | (0.64, 0.35) | 1072    | 87.0 |
| 460 nm chip-2 | 1:1:1:1    | (0.45, 0.33) | 2170    | 81.6 |
| 395 nm chip-1 | 1:1:2:2    | (0.43, 0.37) | 2815    | 85.4 |
| 395 nm chip-2 | 1:1:1:1    | (0.40, 0.36) | 3335    | 74.9 |

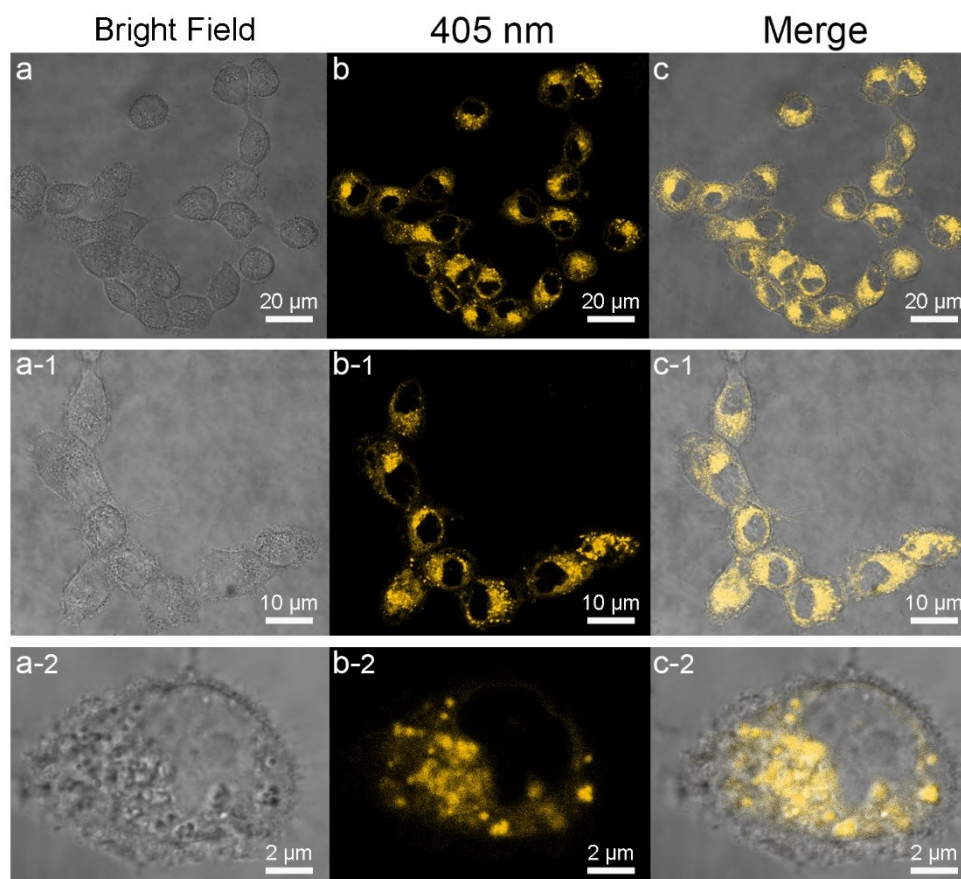

**Figure S13.** Laser scanning confocal microscopy images of Cal27 cells labeled by o-CDs aqueous solution ( $100 \mu\text{g mL}^{-1}$ ) with bright field a), excitation at 405 nm b) and merge c).

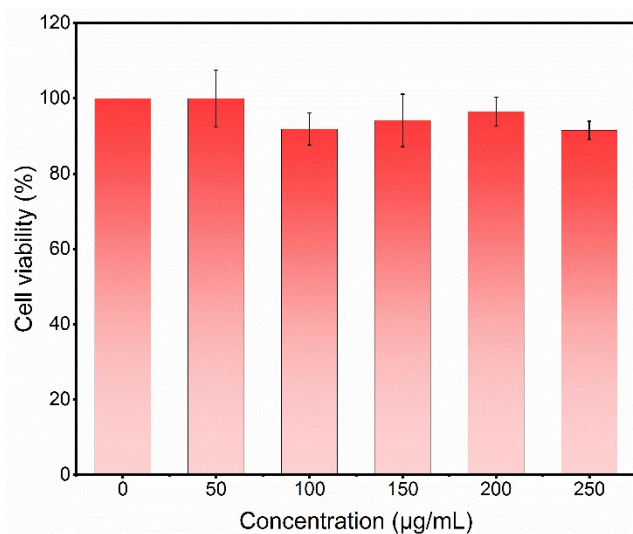

**Figure S14.** MTT assay on Cal27 cells line after incubating with different concentration of CDs solution.
